# Supplementary material
Source: PubMed Central journal article supplement (PMC5733598)

---

**Mammalian Numb protein antagonizes Notch by controlling postendocytic trafficking of the Notch ligand Delta-like 4**

Ximing Shao<sup>1#</sup>, Zhihao Ding<sup>1#</sup>, Ming Zhao<sup>2</sup>, Ke Liu<sup>1</sup>, Haiyan Sun<sup>1</sup>, Juntao Chen<sup>1</sup>, Xianming Liu<sup>1</sup>,  
Yuzhen Zhang<sup>3</sup>, Yang Hong<sup>4</sup>, Huashun Li<sup>5\*</sup>, and Hongchang Li<sup>1\*</sup>

<sup>1</sup>Shenzhen Key Laboratory for Molecular Biology of Neural Development, Guangdong Key Laboratory of Nanomedicine, Institute of Biomedicine and Biotechnology, Shenzhen Institutes of Advanced Technology, Chinese Academy of Sciences, Shenzhen, Guangdong 518055, China;

<sup>2</sup>Department of Oncology, Affiliated Hospital of Southwest Medical University, Luzhou, Sichuan 646000, China;

<sup>3</sup>Research Center for Translational Medicine, Key Laboratory of Arrhythmias of the Ministry of Education of China, Shanghai East Hospital, Tongji University School of Medicine, Shanghai 200120, China;

<sup>4</sup>Department of Cell Biology & Physiology, University of Pittsburgh School of Medicine, Pittsburgh, PA 15261, USA;

<sup>5</sup>ATCG Corp., BioBay, Suzhou Industrial Park, Suzhou, Jiangsu 215123, China.

\*To whom correspondence should be addressed: Dr. Huashun Li, Email: huashunli@tongji.edu.cn; Dr. Hongchang Li, Email: hc.li@siat.ac.cn.

#These authors contribute equally to this work.

### **Supplementary Figure Legends**

**FIGURE S1. Single deletion of Numb or Numbl like has no effect on Notch1 activation and Dll4 expression.**

*A-C*, Western blot analysis of expression of Notch signaling pathway components (Notch1, Hes1, Hey1 and Dll4) in HUVECs transfected with Numb (*A*) or Numbl like (*B* and *C*) knockdown shRNAs.

*D and E*, AD293-HA-Dll4 cells transfected with indicated shRNAs were lysed to detect Notch signaling pathway components by western blot analysis.

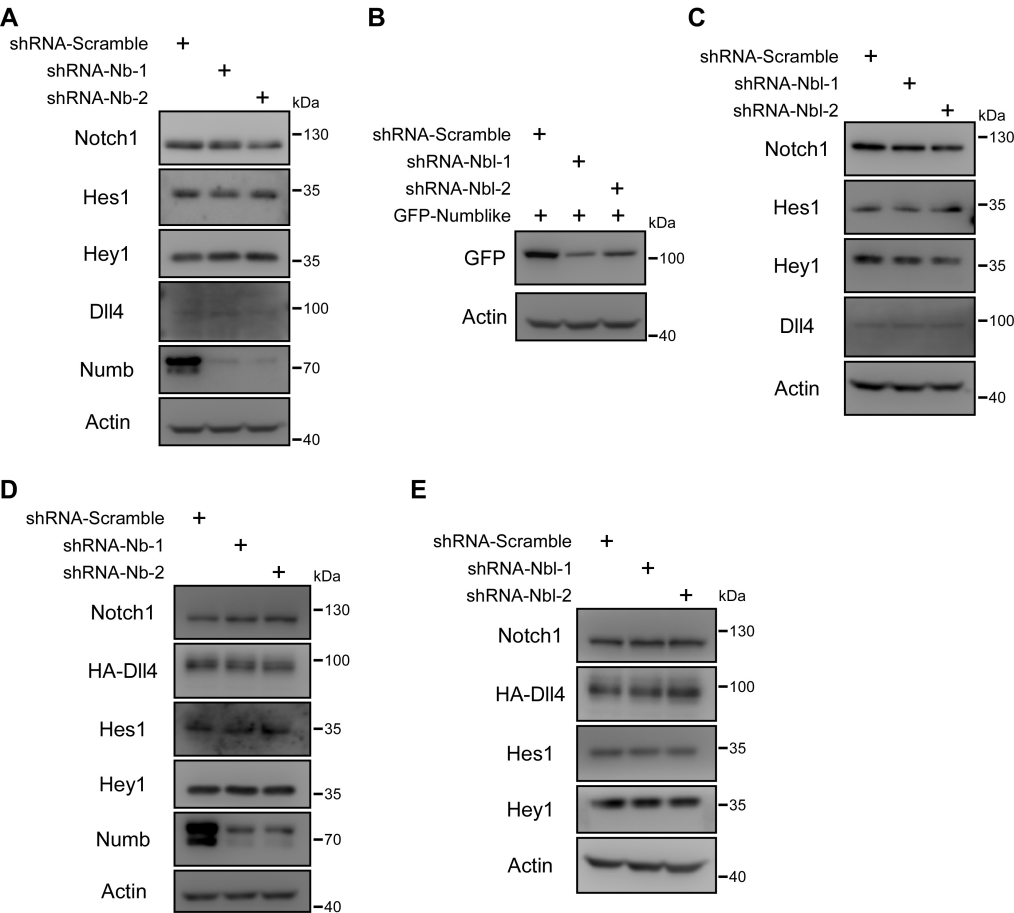

Supplement: 10.1074_M117.800946_jbc.M117.800946-1.pdf [file 10.1074_M117.800946_jbc.M117.800946-1.pdf]
